# Supplementary material for: Wearable respiratory sensors for non-invasive healthcare monitoring: applications and intelligent technologies
Source: Royal Society of Chemistry journal article supplement (doi:10.1039/d5nr04233j), 2026-01-01
Supplement: d5nr04233j1.pdf [file d5nr04233j1.pdf]

## Supporting information

# Wearable respiratory sensors for non-invasive healthcare monitoring: applications and intelligent technologies

*Luming Yu,<sup>†</sup> Guiyan Liu,<sup>†</sup> Hao Zhang and Dan Wen\**

School of Materials Science and Engineering, Northwestern Polytechnical University,

Xi'an 710072, P. R. China

**Table S1.** Comparison of various types of sensors in terms of target gas, sensitivity, detection limit, response/recovery time, mechanical flexibility, cost, and integrability.

| Types of sensors        | Target gas                                                          | Sensitivity                | LOD     | $\tau_{\text{res}}/\tau_{\text{rec}}$ | Flexibility | Integrability / Cost                                     |
|-------------------------|---------------------------------------------------------------------|----------------------------|---------|---------------------------------------|-------------|----------------------------------------------------------|
| Chemiresistive sensors  | VOCs; NH <sub>3</sub> , NO, etc.                                    | 1-10 <sup>2</sup> /10 ppm  | ppt-ppb | 10-10 <sup>2</sup> s                  | Good        | Low cost and easy integrability;<br>Easily mass-produced |
| Electrochemical sensors | Acetone, NH <sub>3</sub> , NO, H <sub>2</sub> O <sub>2</sub> , etc. | nA– $\mu$ A / ppm          | ppt-ppb | < 60 s                                | Medium      | High cost and complex integrability                      |
| Optical sensors         | H <sub>2</sub> S, NO <sub>2</sub> , etc.                            | ---                        | ppb-ppm | ---                                   | Poor        | High cost and complex integrability                      |
| Humidity sensors        | Humidity                                                            | 0.1-10 <sup>20</sup> %/%RH | <1% RH  | < 60 s                                | Good        | Low cost and easy integrability                          |
| Pressure sensors        | Acetone, NH <sub>3</sub> , NO, etc.                                 | 1-10 <sup>3</sup> Hz/ppm   | ppb     | <200 s                                | Poor        | High cost and complex integrability                      |

**Table S2.** Comparison of advantages and disadvantages of the four material categories for practical applicability in real respiratory environments.

| <b>Materials</b>         | <b>Metal oxides</b> | <b>Carbon materials</b>                  | <b>Conductive polymers</b>       | <b>Metal chalcogenides</b>               |
|--------------------------|---------------------|------------------------------------------|----------------------------------|------------------------------------------|
| <b>Work temperature</b>  | High (150-500°C)    | Room temperature                         | Room temperature                 | Room temperature to 200°C                |
| <b>Selectivity</b>       | Poor                | Poor                                     | Excellent to basic gas           | Medium                                   |
| <b>Sensitivity</b>       | High                | Low                                      | Low                              | Medium                                   |
| <b>Stability</b>         | Excellent           | Medium                                   | Poor                             | Poor                                     |
| <b>Target gas</b>        | Wide range of gases | NO <sub>x</sub> , NH <sub>3</sub> , etc. | NH <sub>3</sub> , humidity, etc. | NO <sub>2</sub> , NH <sub>3</sub> , etc. |
| <b>Synthetic process</b> | Easy                | Medium                                   | Medium                           | Complicated                              |

**Table S3.** Evaluation of various energy sources for self-powered systems.

| Power source                 | Power density         | Energy source                           | Wearability |
|------------------------------|-----------------------|-----------------------------------------|-------------|
| Solar cells                  | mW/cm <sup>2</sup>    | Light                                   | Poor        |
| Piezoelectric nanogenerators | μW-W/cm <sup>2</sup>  | Repeatedly applying and releasing force | Good        |
| Triboelectric nanogenerators | μW-mW/cm <sup>2</sup> | Body movement                           | Excellent   |
| Thermoelectric generator     | μW/cm <sup>2</sup>    | Heat                                    | Medium      |
